# Supplementary material for: The UK Myotonic Dystrophy Patient Registry: facilitating and accelerating clinical research
Source: Springer Nature journal article supplement (doi:10.1007/s00415-017-8483-2), 2017-04-10
Supplement: MOESM3 [file 12212506]

**Core dataset for international DM1 registry – final draft 1 August 2009**

|           | <b>Item</b>                                                                                                                                                                                                                                  | <b>Self-report example</b>                                                                                                                                                                                                                                                                                                                                        |
|-----------|----------------------------------------------------------------------------------------------------------------------------------------------------------------------------------------------------------------------------------------------|-------------------------------------------------------------------------------------------------------------------------------------------------------------------------------------------------------------------------------------------------------------------------------------------------------------------------------------------------------------------|
|           | <b>Mandatory items</b>                                                                                                                                                                                                                       |                                                                                                                                                                                                                                                                                                                                                                   |
| <b>1.</b> | <b>Personal data</b><br><br>Sex<br>First name<br>Last name<br>Date of birth<br>Address<br>Zip/post code<br>Telephone<br>Email                                                                                                                | <b>Your personal data:</b><br><br>Sex:<br>First name:<br>Last name:<br>Date of birth:<br>Address:<br>Zip/post code:<br>Telephone:<br>Email:                                                                                                                                                                                                                       |
| <b>2.</b> | <b>Clinical Diagnosis</b><br><br><input type="radio"/> Congenital Myotonic Dystrophy<br><input type="radio"/> DM1<br><input type="radio"/> DM1 asymptomatic mutation carrier<br><input type="radio"/> Other<br><input type="radio"/> Unknown | <b>What is your diagnosis, according to your doctor?</b><br><br><input type="radio"/> Congenital Myotonic Dystrophy<br><input type="radio"/> Myotonic Dystrophy Type 1 (DM1)<br><input type="radio"/> Mutation carrier for DM1 without symptoms<br><input type="radio"/> Other<br><input type="radio"/> I don't know                                              |
| <b>3.</b> | <b>Genetic test result</b><br><br><input type="radio"/> DM1 mutation (triplet repeat expansion)<br><input type="radio"/> Other mutation:.....<br><input type="radio"/> Result pending<br><input type="radio"/> Not tested                    | <b>What is your genetic test result?</b><br><br><input type="radio"/> DM1 mutation (triplet repeat expansion)<br><input type="radio"/> Other mutation:.....<br><input type="radio"/> I have been tested but I haven't received the result yet<br><input type="radio"/> I have not been tested                                                                     |
| <b>4.</b> | <b>Current best motor function</b><br><br><input type="radio"/> Ambulatory (unassisted)<br><input type="radio"/> Ambulatory (assisted)<br><input type="radio"/> Non-ambulatory                                                               | <b>Which of the following options describes the best motor function you are currently able to achieve? (please tick the most appropriate answer)</b><br><br><input type="radio"/> I can walk unaided (without an assistive device)<br><input type="radio"/> I can walk with an assistive device (walker, brace, cane, etc)<br><input type="radio"/> I cannot walk |
| <b>5.</b> | <b>Wheelchair use</b><br><br><input type="radio"/> No<br><input type="radio"/> Part-time (age...)<br><input type="radio"/> Full-time (age ...)                                                                                               | <b>Do you use a wheelchair? (please tick the most appropriate answer)</b><br><br><input type="radio"/> No, not at all<br><input type="radio"/> I use a wheelchair part-time (I started at age: .....)<br><input type="radio"/> I use a wheelchair all the time (I started full-time use at age: .....)<br>.....                                                   |

| Highly encouraged items |                                                                                                                                                                                                                                                                                                                                           |                                                                                                                                                                                                                                                                                                                                                                                                                                                            |
|-------------------------|-------------------------------------------------------------------------------------------------------------------------------------------------------------------------------------------------------------------------------------------------------------------------------------------------------------------------------------------|------------------------------------------------------------------------------------------------------------------------------------------------------------------------------------------------------------------------------------------------------------------------------------------------------------------------------------------------------------------------------------------------------------------------------------------------------------|
| MUSCLE                  |                                                                                                                                                                                                                                                                                                                                           |                                                                                                                                                                                                                                                                                                                                                                                                                                                            |
| 6.                      | <b>Myotonia</b> <ul style="list-style-type: none"> <li><input type="radio"/> Severe</li> <li><input type="radio"/> Mild</li> <li><input type="radio"/> None</li> </ul>                                                                                                                                                                    | <b>Does myotonia (cramping, difficulties releasing your grip, etc.) currently have a negative effect on your normal daily activities?</b> <ul style="list-style-type: none"> <li><input type="radio"/> Yes, severely</li> <li><input type="radio"/> Yes, but only mildly</li> <li><input type="radio"/> Not at all</li> </ul>                                                                                                                              |
| 7.                      | <b>Myotonia medication use</b> <ul style="list-style-type: none"> <li><input type="radio"/> Yes (specify...)</li> <li><input type="radio"/> No</li> <li><input type="radio"/> Unknown</li> </ul>                                                                                                                                          | <b>Do you currently take medication to treat or prevent myotonia?</b> <ul style="list-style-type: none"> <li><input type="radio"/> Yes (specify or choose from drop down list)</li> <li><input type="radio"/> No</li> <li><input type="radio"/> I don't know</li> </ul>                                                                                                                                                                                    |
| CARDIAC                 |                                                                                                                                                                                                                                                                                                                                           |                                                                                                                                                                                                                                                                                                                                                                                                                                                            |
| 8.                      | <b>Heart condition</b> <ul style="list-style-type: none"> <li><input type="radio"/> Yes, not further specified (age...)</li> <li><input type="radio"/> Arrhythmia or conduction block (age...)</li> <li><input type="radio"/> Cardiomyopathy (age...)</li> <li><input type="radio"/> No</li> <li><input type="radio"/> Unknown</li> </ul> | <b>Have you been diagnosed with a heart condition?</b> <ul style="list-style-type: none"> <li><input type="radio"/> Yes, not further specified (at age: ....)</li> <li><input type="radio"/> Yes, with arrhythmia or conduction block (at age: ....)</li> <li><input type="radio"/> Yes, with cardiomyopathy (at age: ....)</li> <li><input type="radio"/> No</li> <li><input type="radio"/> I don't know</li> </ul>                                       |
| 9.                      | <b>Cardiac implant</b> <ul style="list-style-type: none"> <li><input type="radio"/> Yes, not further specified (age ...)</li> <li><input type="radio"/> Pacemaker (age...)</li> <li><input type="radio"/> ICD (age....)</li> <li><input type="radio"/> No</li> <li><input type="radio"/> Unknown</li> </ul>                               | <b>Have you had an operation to implant a device to control/normalize your heart rhythm?</b> <ul style="list-style-type: none"> <li><input type="radio"/> Yes, not further specified (at age: ....)</li> <li><input type="radio"/> Yes, a pacemaker (at age: ....)</li> <li><input type="radio"/> Yes, a combined cardioverter-defibrillator (ICD) (at age: ....)</li> <li><input type="radio"/> No</li> <li><input type="radio"/> I don't know</li> </ul> |
| 10.                     | <b>10. ECG</b><br><br>ECG done: yes/no/unknown<br><br>Sinus rhythm: yes/no<br>PR interval: ..... ms<br>QRS duration: ..... ms<br><br>Date                                                                                                                                                                                                 | <b>Have you had an electrocardiogram (ECG)?</b> <ul style="list-style-type: none"> <li><input type="radio"/> Yes</li> <li><input type="radio"/> No</li> <li><input type="radio"/> I don't know</li> </ul> <b>If yes, please fill in the ECG results:</b><br><br>Sinus rhythm: yes/no<br>PR interval: ..... ms<br>QRS duration: ..... ms<br><br>Date of examination: .....                                                                                  |
| 11.                     | <b>Echocardiogram</b><br><br>Echo done: yes/no/unknown<br><br>LVEF: ...%<br>Date                                                                                                                                                                                                                                                          | <b>Have you had an ultrasound of the heart (echocardiography)?</b> <ul style="list-style-type: none"> <li><input type="radio"/> Yes</li> <li><input type="radio"/> No</li> <li><input type="radio"/> I don't know</li> </ul> <b>If yes, please fill in the echocardiography results:</b><br><br>LVEF .....%<br>Date of examination: .....                                                                                                                  |

|                  |                                                                                                                                      |                                                                                                                                                                                                                                                                              |
|------------------|--------------------------------------------------------------------------------------------------------------------------------------|------------------------------------------------------------------------------------------------------------------------------------------------------------------------------------------------------------------------------------------------------------------------------|
| 12.              | <b>Cardiac medication use</b><br><input type="radio"/> Yes (specify...)<br><input type="radio"/> No<br><input type="radio"/> Unknown | <b>Do you currently take any medication to treat or protect your heart (e.g. ACE-inhibitors, beta-blockers, or anti-arrhythmics)?</b><br><input type="radio"/> Yes (specify or choose from drop down list)<br><input type="radio"/> No<br><input type="radio"/> I don't know |
| <b>PULMONARY</b> |                                                                                                                                      |                                                                                                                                                                                                                                                                              |
| 13.              | <b>Non-invasive ventilation</b><br><input type="radio"/> Full-time<br><input type="radio"/> Part-time<br><input type="radio"/> None  | <b>Do you regularly use a non-invasive ventilation device?</b><br><input type="radio"/> Yes, all day<br><input type="radio"/> Yes, but only part-time (e.g. at night)<br><input type="radio"/> No, never                                                                     |
| 14.              | <b>Invasive ventilation</b><br><input type="radio"/> Full-time<br><input type="radio"/> Part-time<br><input type="radio"/> None      | <b>Do you use invasive ventilation?</b><br><input type="radio"/> Yes, all day<br><input type="radio"/> Yes, part-time<br><input type="radio"/> No                                                                                                                            |
| 15.              | <b>Pulmonary function testing</b><br>FVC done: yes/no/unknown<br><br>FVC: ...%<br>Date                                               | <b>Have you had pulmonary function testing?</b><br><input type="radio"/> Yes,<br><input type="radio"/> No<br><input type="radio"/> I don't know<br><br><b>If yes, please fill in the results of the test:</b><br><br>FVC .....% (predicted value)<br>Date of the test:.....  |
| <b>DIGESTIVE</b> |                                                                                                                                      |                                                                                                                                                                                                                                                                              |
| 16.              | <b>Dysphagia</b><br><input type="radio"/> Yes<br><input type="radio"/> No<br><input type="radio"/> Unknown                           | <b>Do you have difficulty swallowing (food gets stuck in your throat, choking, etc)?</b><br><input type="radio"/> Yes<br><input type="radio"/> No<br><input type="radio"/> I don't know                                                                                      |
| 17.              | <b>Gastric/nasogastric tube</b><br><input type="radio"/> Yes<br><input type="radio"/> No<br><input type="radio"/> Unknown            | <b>Do you have a tube (gastric/nasal) for feeding?</b><br><input type="radio"/> Yes<br><input type="radio"/> No<br><input type="radio"/> I don't know                                                                                                                        |
| <b>OTHER</b>     |                                                                                                                                      |                                                                                                                                                                                                                                                                              |
| 18.              | <b>Cataract surgery</b><br><input type="radio"/> Yes (age ...)<br><input type="radio"/> No<br><input type="radio"/> Unknown          | <b>Have you had eye surgery for cataract removal?</b><br><input type="radio"/> Yes (at age: ....)<br><input type="radio"/> No<br><input type="radio"/> I don't know                                                                                                          |
| 19.              | <b>Fatigue/sleepiness</b><br><input type="radio"/> Severe<br><input type="radio"/> Mild<br><input type="radio"/> No                  | <b>Does fatigue or daytime sleepiness currently have a negative effect on your normal daily activities?</b><br><input type="radio"/> Yes, severely<br><input type="radio"/> Yes, but only mildly<br><input type="radio"/> Not at all                                         |

|     |                                                                                                                                                                                                                                                                                                                                                |                                                                                                                                                                                                                                                                                                                                                                                                                                                                                                     |
|-----|------------------------------------------------------------------------------------------------------------------------------------------------------------------------------------------------------------------------------------------------------------------------------------------------------------------------------------------------|-----------------------------------------------------------------------------------------------------------------------------------------------------------------------------------------------------------------------------------------------------------------------------------------------------------------------------------------------------------------------------------------------------------------------------------------------------------------------------------------------------|
| 20. | <b>Fatigue medication use</b> <ul style="list-style-type: none"> <li><input type="radio"/> Yes</li> <li><input type="radio"/> No</li> <li><input type="radio"/> Unknown</li> </ul>                                                                                                                                                             | <b>Do you currently take any medication to treat or prevent fatigue or daytime sleepiness?</b> <ul style="list-style-type: none"> <li><input type="radio"/> Yes (specify or choose from drop down list)</li> <li><input type="radio"/> No</li> <li><input type="radio"/> I don't know</li> </ul>                                                                                                                                                                                                    |
| 21. | <b>Age of onset</b> <ul style="list-style-type: none"> <li><input type="radio"/> Congenital</li> <li><input type="radio"/> Age .....</li> <li><input type="radio"/> Asymptomatic</li> <li><input type="radio"/> Unknown</li> </ul>                                                                                                             | <b>At what age did the first medical problems occur that may be related to your myotonic dystrophy?</b> <ul style="list-style-type: none"> <li><input type="radio"/> At birth or within the first 4 weeks of life</li> <li><input type="radio"/> At age .....</li> <li><input type="radio"/> I have no symptoms of myotonic dystrophy</li> <li><input type="radio"/> I don't know</li> </ul>                                                                                                        |
| 22. | <b>Genetic details/repeat size</b> <ul style="list-style-type: none"> <li><input type="radio"/> date of test</li> <li><input type="radio"/> name of laboratory</li> <li><input type="radio"/> method of testing</li> <li><input type="radio"/> repeat size</li> <li><input type="radio"/> No</li> <li><input type="radio"/> Unknown</li> </ul> | <b>Are details of your genetic test available?</b> <ul style="list-style-type: none"> <li><input type="radio"/> Yes <ul style="list-style-type: none"> <li><input type="checkbox"/> date of test.....</li> <li><input type="checkbox"/> name of laboratory</li> <li><input type="checkbox"/> method of testing (Southern, PCR, RP-PCR)</li> <li><input type="checkbox"/> repeat size: ..... bp</li> </ul> </li> <li><input type="radio"/> No</li> <li><input type="radio"/> I don't know</li> </ul> |
| 23. | <b>Positive family history</b> <ul style="list-style-type: none"> <li><input type="radio"/> Yes</li> <li><input type="radio"/> No</li> <li><input type="radio"/> Unknown</li> </ul>                                                                                                                                                            | <b>Has anybody else in your family been diagnosed with the same disease?</b> <ul style="list-style-type: none"> <li><input type="radio"/> Yes</li> <li><input type="radio"/> No</li> <li><input type="radio"/> I don't know</li> </ul>                                                                                                                                                                                                                                                              |
| 24. | <b>Ethnic origin</b> <ul style="list-style-type: none"> <li><input type="radio"/> Caucasian</li> <li><input type="radio"/> Black African/African American</li> <li><input type="radio"/> Asian</li> <li><input type="radio"/> Mixed</li> <li><input type="radio"/> Other</li> <li><input type="radio"/> Declined</li> </ul>                    | <b>How would you describe your ethnic origin?</b> <ul style="list-style-type: none"> <li><input type="radio"/> White - European origin (Caucasian)</li> <li><input type="radio"/> Black African/African American</li> <li><input type="radio"/> Asian</li> <li><input type="radio"/> Mixed</li> <li><input type="radio"/> Other</li> <li><input type="radio"/> I choose not to answer this question</li> </ul>                                                                                      |
| 25. | <b>Other registry</b> <ul style="list-style-type: none"> <li><input type="radio"/> Yes (specify...)</li> <li><input type="radio"/> No</li> <li><input type="radio"/> Unknown</li> </ul>                                                                                                                                                        | <b>Have you signed up for any other myotonic dystrophy registry?</b> <ul style="list-style-type: none"> <li><input type="radio"/> Yes (if yes, please specify: .....)</li> <li><input type="radio"/> No</li> <li><input type="radio"/> I don't know</li> </ul>                                                                                                                                                                                                                                      |
